# Supplementary material
Source: MDPI journal article supplement (https://www.mdpi.com/1996-1073/14/13/3840)
Supplement: s1 [file s1]

## *Supplementary Materials*

for

# **A Comparative Study on Thermochemical Valorization Routes for Spent Coffee Grounds**

**Table S1.** Raw data for microwave-assisted extraction of spent coffee grounds oil.

| Standard Order | Microwave Power (W) | Solvent/Solid Ratio (mL/g) | Time (min) | SCG Oil Yield (wt.%) |
|----------------|---------------------|----------------------------|------------|----------------------|
| 1              | 200                 | 4                          | 5          | 6.15                 |
| 2              | 500                 | 4                          | 5          | 5.73                 |
| 3              | 200                 | 8                          | 5          | 8.26                 |
| 4              | 500                 | 8                          | 5          | 7.87                 |
| 5              | 200                 | 4                          | 15         | 3.68                 |
| 6              | 500                 | 4                          | 15         | 5.92                 |
| 7              | 200                 | 8                          | 15         | 8.51                 |
| 8              | 500                 | 8                          | 15         | 8.22                 |
| 9              | 200                 | 6                          | 10         | 6.89                 |
| 10             | 500                 | 6                          | 10         | 6.91                 |
| 11             | 350                 | 4                          | 10         | 6.03                 |
| 12             | 350                 | 8                          | 10         | 7.34                 |
| 13             | 350                 | 6                          | 5          | 7.78                 |
| 14             | 350                 | 6                          | 15         | 7.32                 |
| 15             | 350                 | 6                          | 10         | 7.33                 |
| 16             | 350                 | 6                          | 10         | 7.74                 |
| 17             | 350                 | 6                          | 10         | 7.39                 |
| 18             | 350                 | 6                          | 10         | 7.48                 |
| 19             | 350                 | 6                          | 10         | 7.32                 |
| 20             | 350                 | 6                          | 10         | 7.50                 |

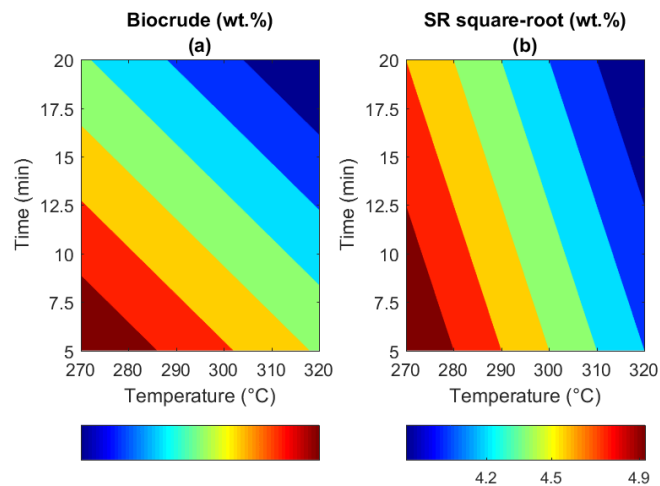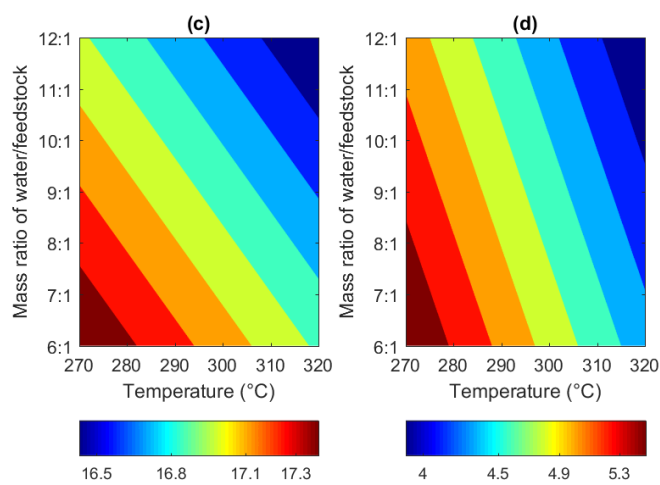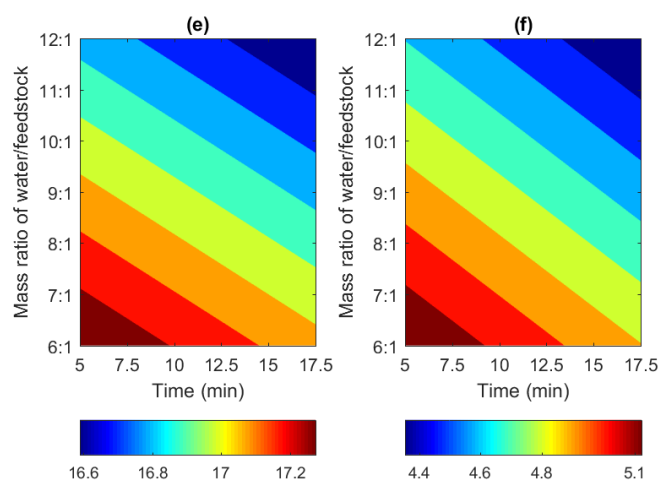

**Figure S1.** Contour plots for biocrude yield (a), (c) and (e), and solid residue (SR) (b), (d) and (f) from hydrothermal liquefaction of post-extracted spent coffee grounds. Square root values of SR yield are shown in the plots.

**Table S2** Chemical composition for biocrude derived from raw spent coffee grounds.

| Compounds' Name                                                              | Chemical Class           | Peak Area Percentage (%) |
|------------------------------------------------------------------------------|--------------------------|--------------------------|
| n-Hexadecanoic acid                                                          | acid                     | 5.5                      |
| Glycodeoxycholic acid                                                        | acid                     | 3.0                      |
| 1-Dodecanol                                                                  | alcohol                  | 2.2                      |
| Ethanol, 2-(9,12-octadecadienyloxy)-, (Z,Z)-                                 | alcohol                  | 1.5                      |
| E,E,Z-1,3,12-Nonadecatriene-5,14-diol                                        | alcohol                  | 6.1                      |
| Hexadecanamide                                                               | amide                    | 4.6                      |
| Caffeine                                                                     | amine                    | 10.0                     |
| Hexadecanoic acid, methyl ester                                              | ester                    | 1.3                      |
| 8,11-Octadecadienoic acid, methyl ester                                      | ester                    | 1.2                      |
| Glycidyl palmitate                                                           | ester                    | 4.1                      |
| Hexanedioic acid, bis(2-ethylhexyl) ester                                    | ester                    | 3.1                      |
| 3-Hydroxypropyl palmitate, TMS derivative                                    | ester                    | 3.1                      |
| Heptanoic acid, dicotyl ester                                                | ester                    | 2.0                      |
| 1,2-Propanediol, 3-(octadecyloxy)-, diacetate                                | ester                    | 1.8                      |
| Propanoic acid, 3,3'-thiobis-, didodecyl ester                               | ester                    | 19.1                     |
| Heptadecane, 9-hexyl-                                                        | hydrocarbon              | 1.6                      |
| Octadecane, 3-ethyl-5-(2-ethylbutyl)-                                        | hydrocarbon              | 6.7                      |
| Spirolactone                                                                 | ketone                   | 4.9                      |
| 3,6-Diisopropylpiperazin-2,5-dione                                           | N-containing heterocycle | 1.7                      |
| Cyclo-(1-leucyl-1-phenylalanyl)                                              | N-containing heterocycle | 1.6                      |
| 2,5-Piperazinedione, 3,6-bis(2-methylpropyl)-                                | N-containing heterocycle | 1.7                      |
| Phenol                                                                       | phenolic                 | 7.4                      |
| Phenol, 2,2'-methylenebis[6-(1,1-dimethylethyl)-4-ethyl- $\zeta$ -Sitosterol | phenolic                 | 2.1                      |
|                                                                              | phenolic                 | 3.7                      |

**Table S3** Chemical composition for biocrude derived from defatted spent coffee grounds.

| Compounds' Name                           | Chemical Class | Peak Area Percentage (%) |
|-------------------------------------------|----------------|--------------------------|
| n-Hexadecanoic acid                       | acid           | 7.7                      |
| Hexadecanoic acid                         | acid           | 2.4                      |
| Linoelaidic acid                          | acid           | 2.0                      |
| Octadecanoic                              | acid           | 1.5                      |
| Hexadecanamide                            | amide          | 5.2                      |
| Hexadecanoic acid, methyl ester           | ester          | 4.7                      |
| 9-Octadecenoic acid (Z)-, tetradecylester | ester          | 2.3                      |
| 8,11-Octadecadienoic acid, methyl ester   | ester          | 1.4                      |
| Methyl stearate                           | ester          | 1.3                      |
| Glycyl-L-histidyl-L-lysine acetate        | ester          | 1.2                      |
| Furan, 2-pentyl-                          | furan          | 1.3                      |
| Pentacosane                               | hydrocarbon    | 3.7                      |

|                                                |                          |      |
|------------------------------------------------|--------------------------|------|
| Hexatriacontane                                | hydrocarbon              | 2.4  |
| Octadecane, 3-ethyl-5-(2-ethylbutyl)-          | hydrocarbon              | 1.2  |
| Spironolactone                                 | ketone                   | 2.1  |
| 2-Cyclopenten-1-one, 2,3-dimethyl-             | ketone                   | 1.7  |
| Caffeine                                       | N-containing heterocycle | 17.3 |
| 3,6-Diisopropylpiperazin-2,5-dione             | N-containing heterocycle | 3.1  |
| 2,5-Piperazinedione, 3,6-bis(2-methylpropyl)-  | N-containing heterocycle | 2.8  |
| Pyrrolo[1,2-a]pyrazine-1,4-dione               | N-containing heterocycle | 2.5  |
| Cyclo-(l-leucyl-l-phenylalanyl)                | N-containing heterocycle | 2.5  |
| Pyrrolo[1,2-a]pyrazine-1,4-dione               | N-containing heterocycle | 2.3  |
| 2-Pyrrolidinone, 1-methyl-                     | N-containing heterocycle | 2.1  |
| 3,6-Diisopropylpiperazin-2,5-dione             | N-containing heterocycle | 1.8  |
| Pyrrolo[1,2-a]pyrazine-1,4-dione, hexahydro-3- | N-containing heterocycle | 1.7  |
| 7-Ethyl-4,6-pentadecandione                    | N-containing heterocycle | 1.6  |
| 2,5-Piperazinedione, 3-benzyl-6-isopropyl-     | N-containing heterocycle | 1.4  |
| 1,2-Cyclopentanedione, 3-methyl-               | N-containing heterocycle | 1.3  |
| Phenol                                         | phenolic                 | 12.0 |
| Heptatriacotanol                               | phenolic                 | 2.1  |
| Phenol, 4,4'-(1-methylethylidene)bis-          | phenolic                 | 1.7  |
| 3-Isopropoxy-1,1,1,7,7,7-hexamethyl-           | phenolic                 | 1.6  |
